# Supplementary material for: RAS at the Golgi antagonizes malignant transformation through PTPRκ-mediated inhibition of ERK activation
Source: PubMed Central journal article supplement (PMC6125387; doi:10.1038/s41467-018-05941-8), 2018-09-05
Supplement: 41467_2018_5941_MOESM1_ESM.pdf [file 41467_2018_5941_MOESM1_ESM.pdf]

## **Supplementary Information**

**RAS at the Golgi antagonizes malignant transformation through PTPRk mediated inhibition of ERK activation.**

**Casar et al.**

# Supplementary Figure 1

a

MCF-7 control

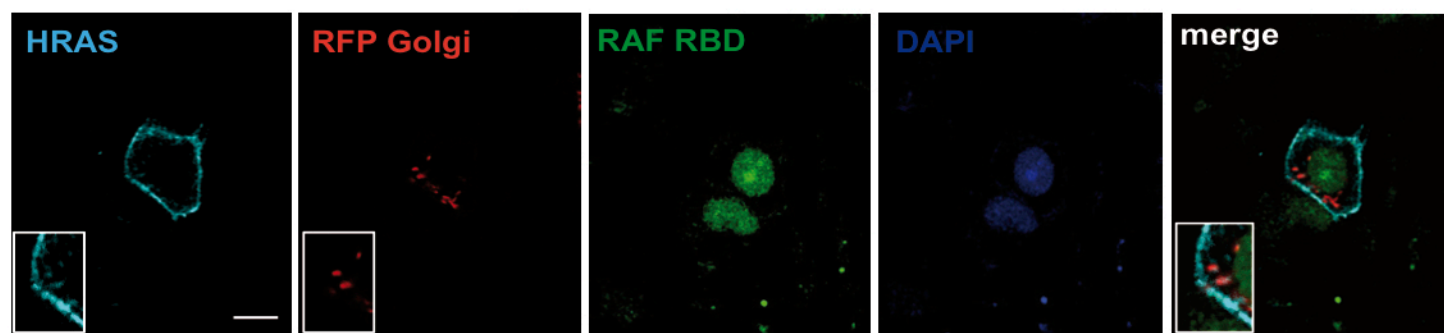

MCF-7 TGF- $\beta$  (30 min)

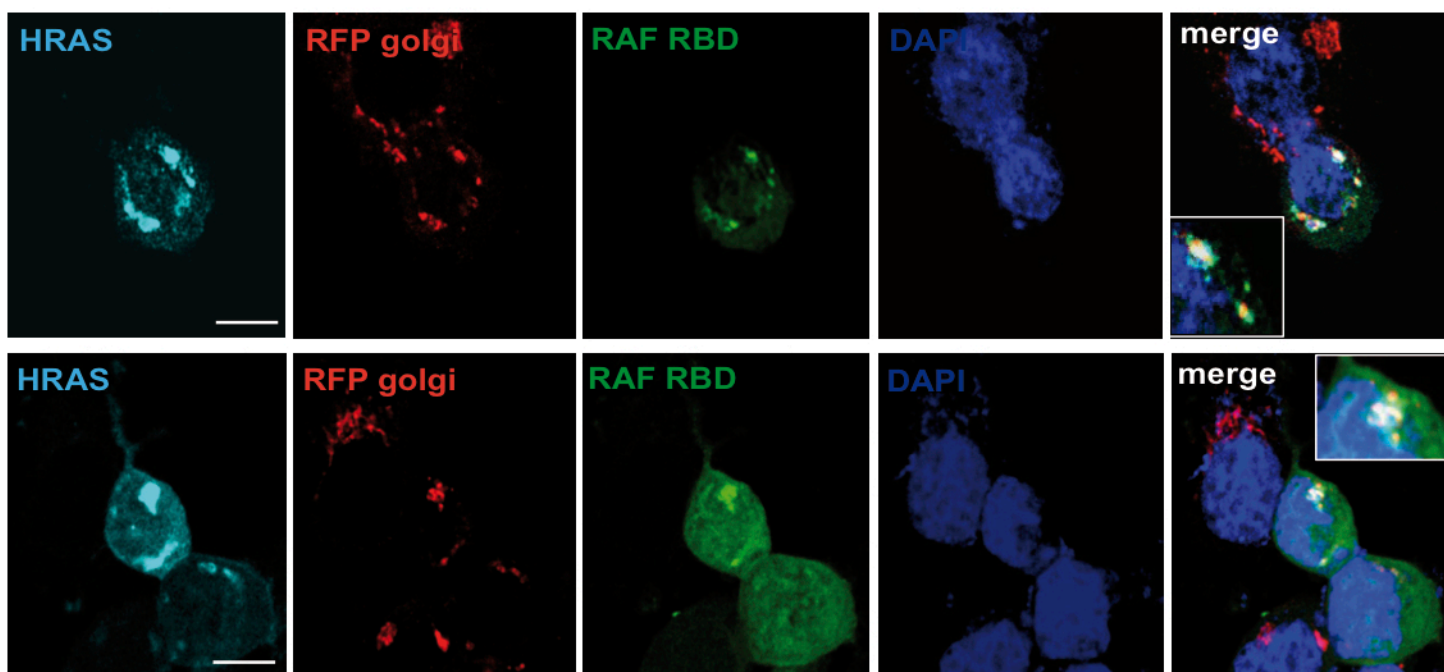

b

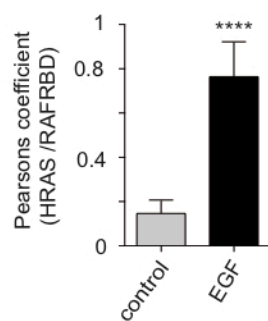

c

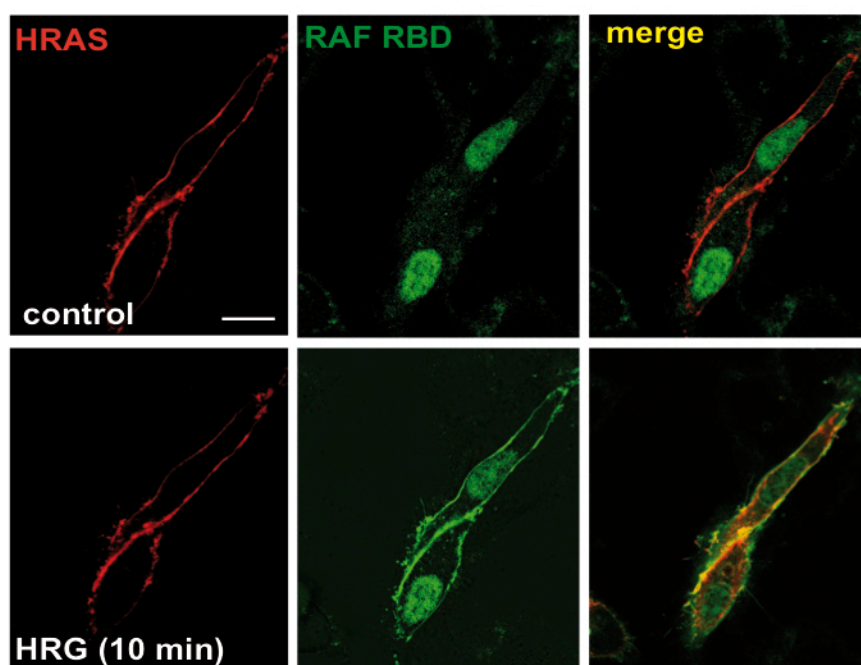

d

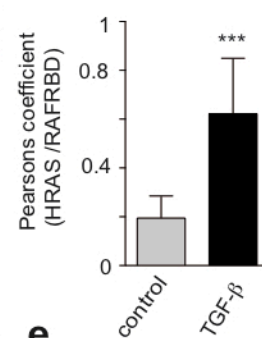

e

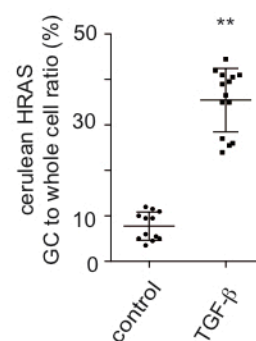

**Supplementary Figure 1. RAS activation at the GC in response to apoptogenic stimulation.**

**a)** RAS activation in endomembranes in MCF-7 cells, control and treated with TGF- $\beta$ . Cells were transfected with constructs expressing cerulean-HRAS and the RAS-GTP biosensor E3-R3 (RAF RBD) (1  $\mu$ g each) and stimulated for 30 min. GC was revealed by the RFP Golgi probe. Insets show areas of prominent RAS-GTP accumulation in the GC. Scale bar = 10  $\mu$ m. **b)** Pearson's correlation coefficient of mCherry HRAS and GFP RAFRBD colocalization at the plasma-membrane in control and EGF-treated cells (50ng/ml, 5 min). Data shows average  $\pm$  SEM from 3 independent experiments, each with 12-14 fields/group and an average of 4-6 cells per random field. \*\*\*\*  $p < 0.0001$  by Student t-test. **c)** RAS activation by HRG is restricted to the plasma-membrane. MCF-7 cells transfected with constructs expressing cherry-HRAS and the RAS-GTP biosensor E3-R3 (RAF-RBD) (1  $\mu$ g each) and stimulated for the indicated times. Scale bar = 10  $\mu$ m. **d)** Pearson's correlation coefficient of cerulean HRAS and GFP RAF-RBD and RFP-Golgi colocalization in control and TGF- $\beta$  -treated cells (5ng/ml, 30 min). Data shows average  $\pm$  SEM from 3 independent experiments, each with 12-14 fields/group and an average of 4-6 cells per random field. \*\*\*  $p < 0.005$  by Student t-test. **e)** Cerulean HRAS activation at Golgi / whole cell ratio in control and TGF- $\beta$  -treated cells. Data shows average  $\pm$  SEM from 3 independent experiments, each with 12-14 fields/group and an average of 4-6 cells per random field. \*\*  $p < 0.01$  by Student t-test.

# Supplementary Figure 2

**a**

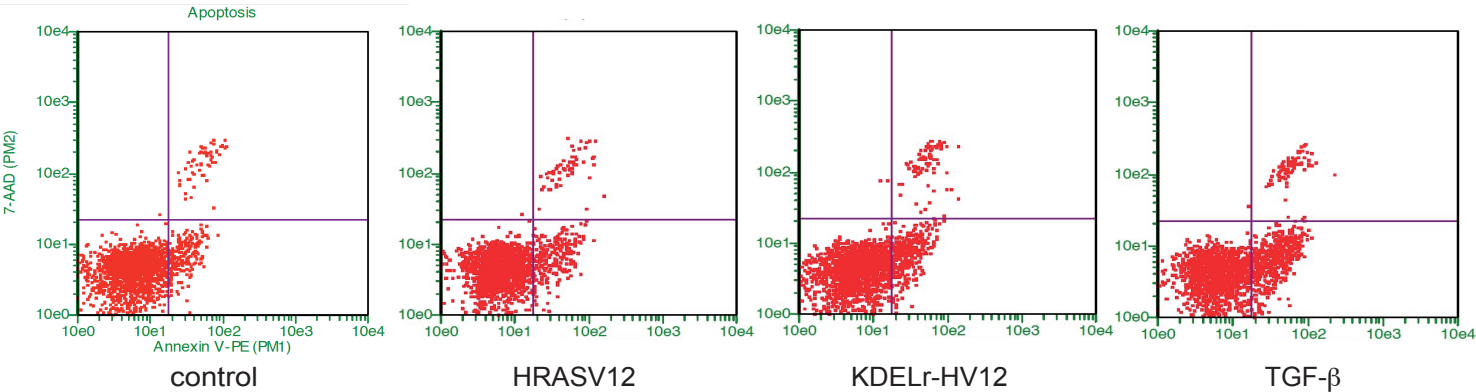

**b**

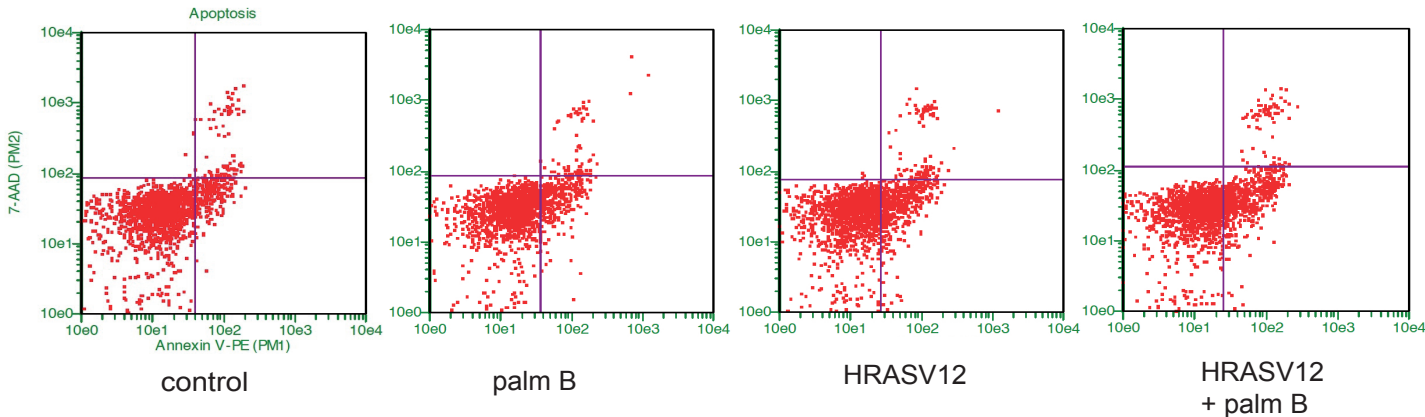



**Supplementary Figure 2. Induction of apoptosis by RAS activation at the GC.** **a)** Induction of apoptosis in MCF-7 cells transfected with the indicated constructs (1  $\mu$ g each) or treated with TGF- $\beta$  (5ng/ml for 12 hrs). **b)** Apoptosis in response to palmostatin B treatment (10  $\mu$ M, 24 hrs) in cells transfected with the indicated constructs (1  $\mu$ g each). In both cases apoptosis was evaluated by annexin V detection using the Guava /nexin assay.

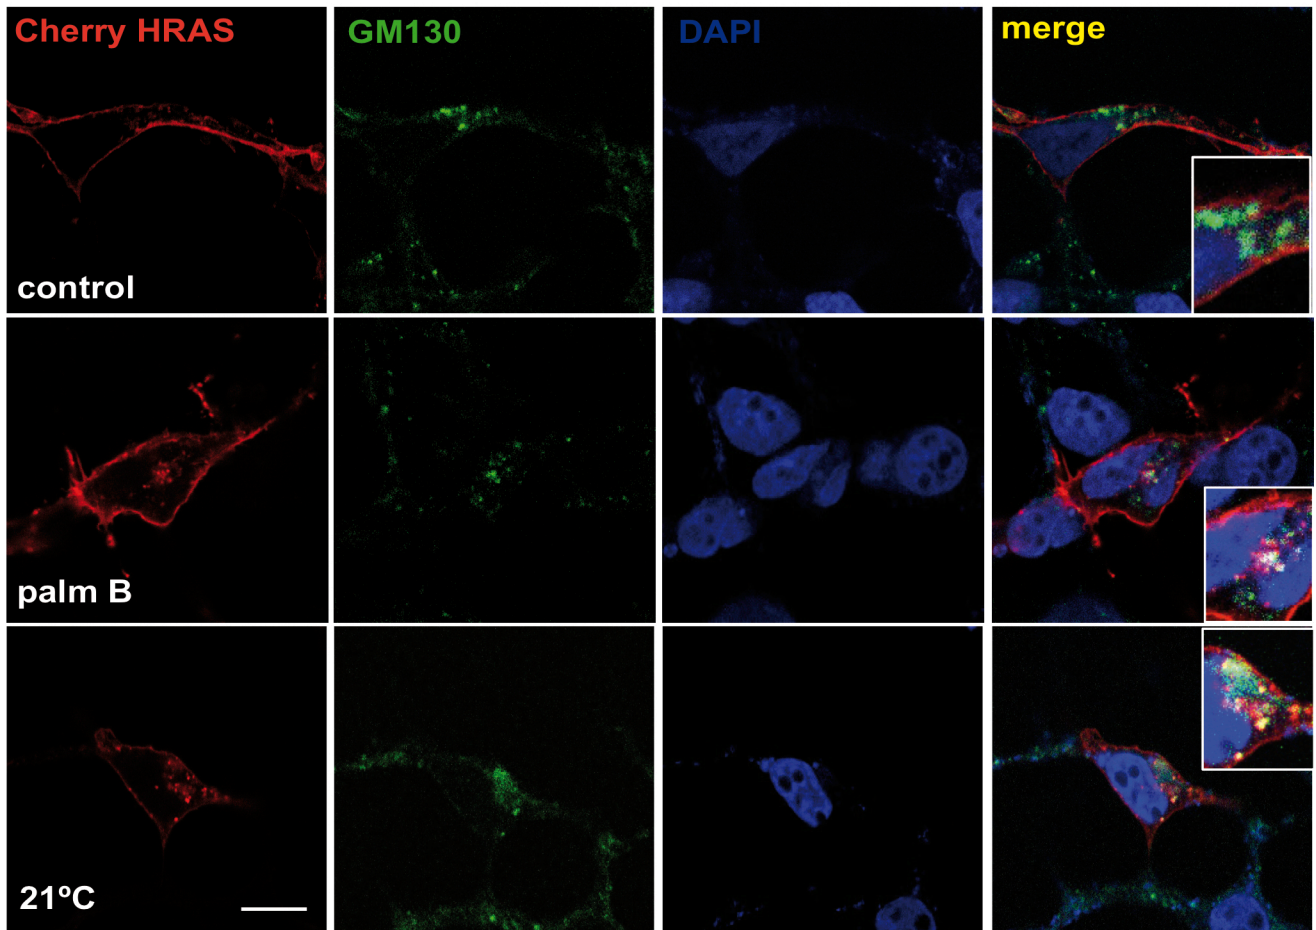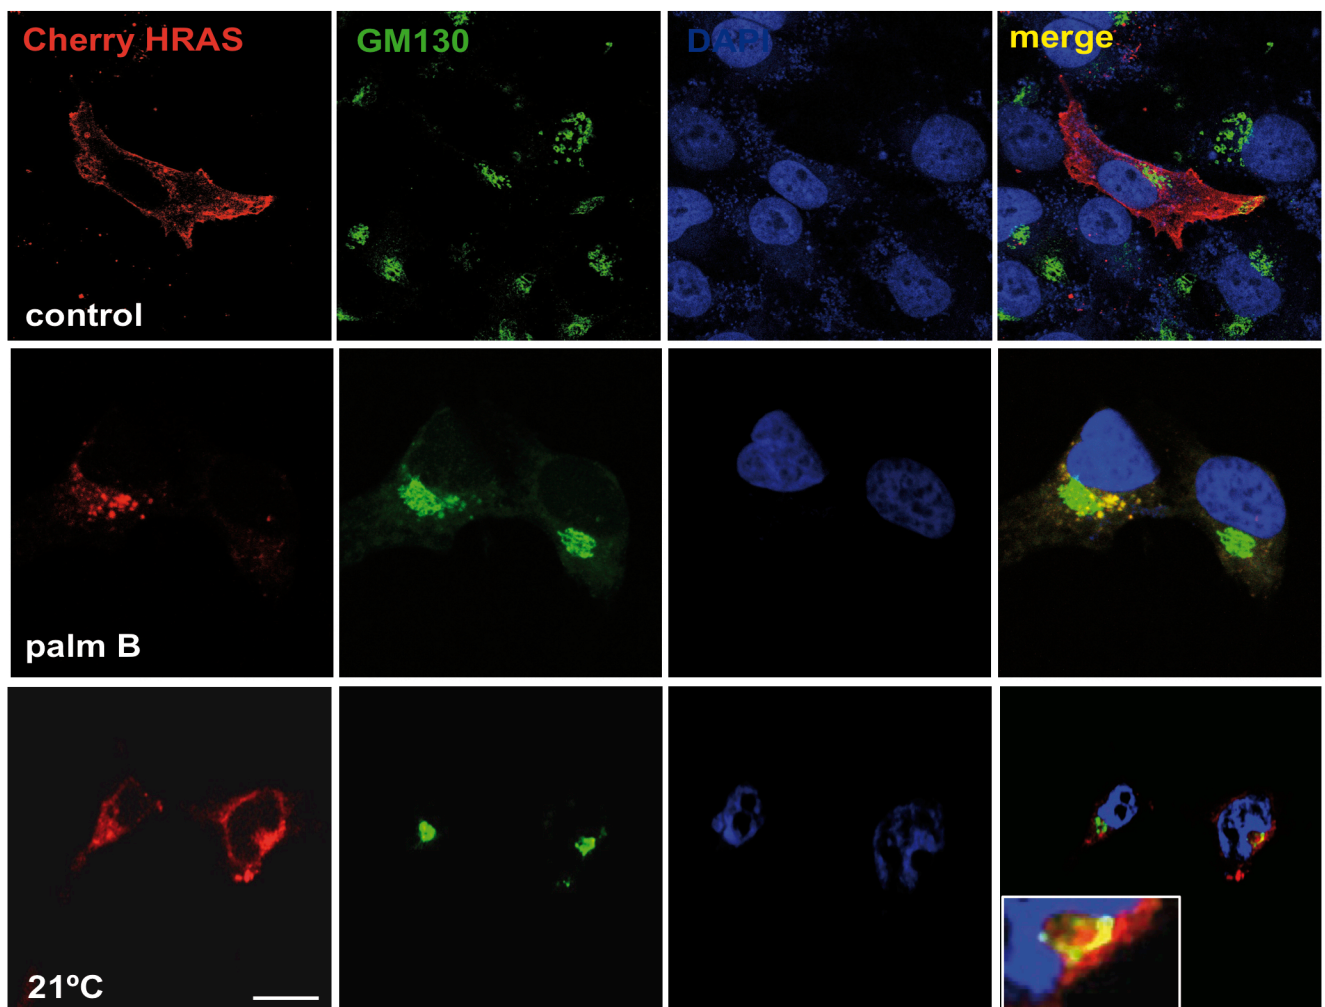

**Supplementary Figure 3. RAS translocation to the GC in response to palmostatin B and 21°C treatments.** RAS sublocalization was analyzed in A375 and T24 cells, control and treated with palmostatin B (10  $\mu$ M, 24 hrs) o cultured at 21°C for 24 hrs. Cells were transfected with cherry-HRAS (1  $\mu$ g). GC was revealed by GM 130 staining. Insets show areas of prominent RAS accumulation at the GC. Scale bar = 10  $\mu$ m.

# Supplementary Figure 4

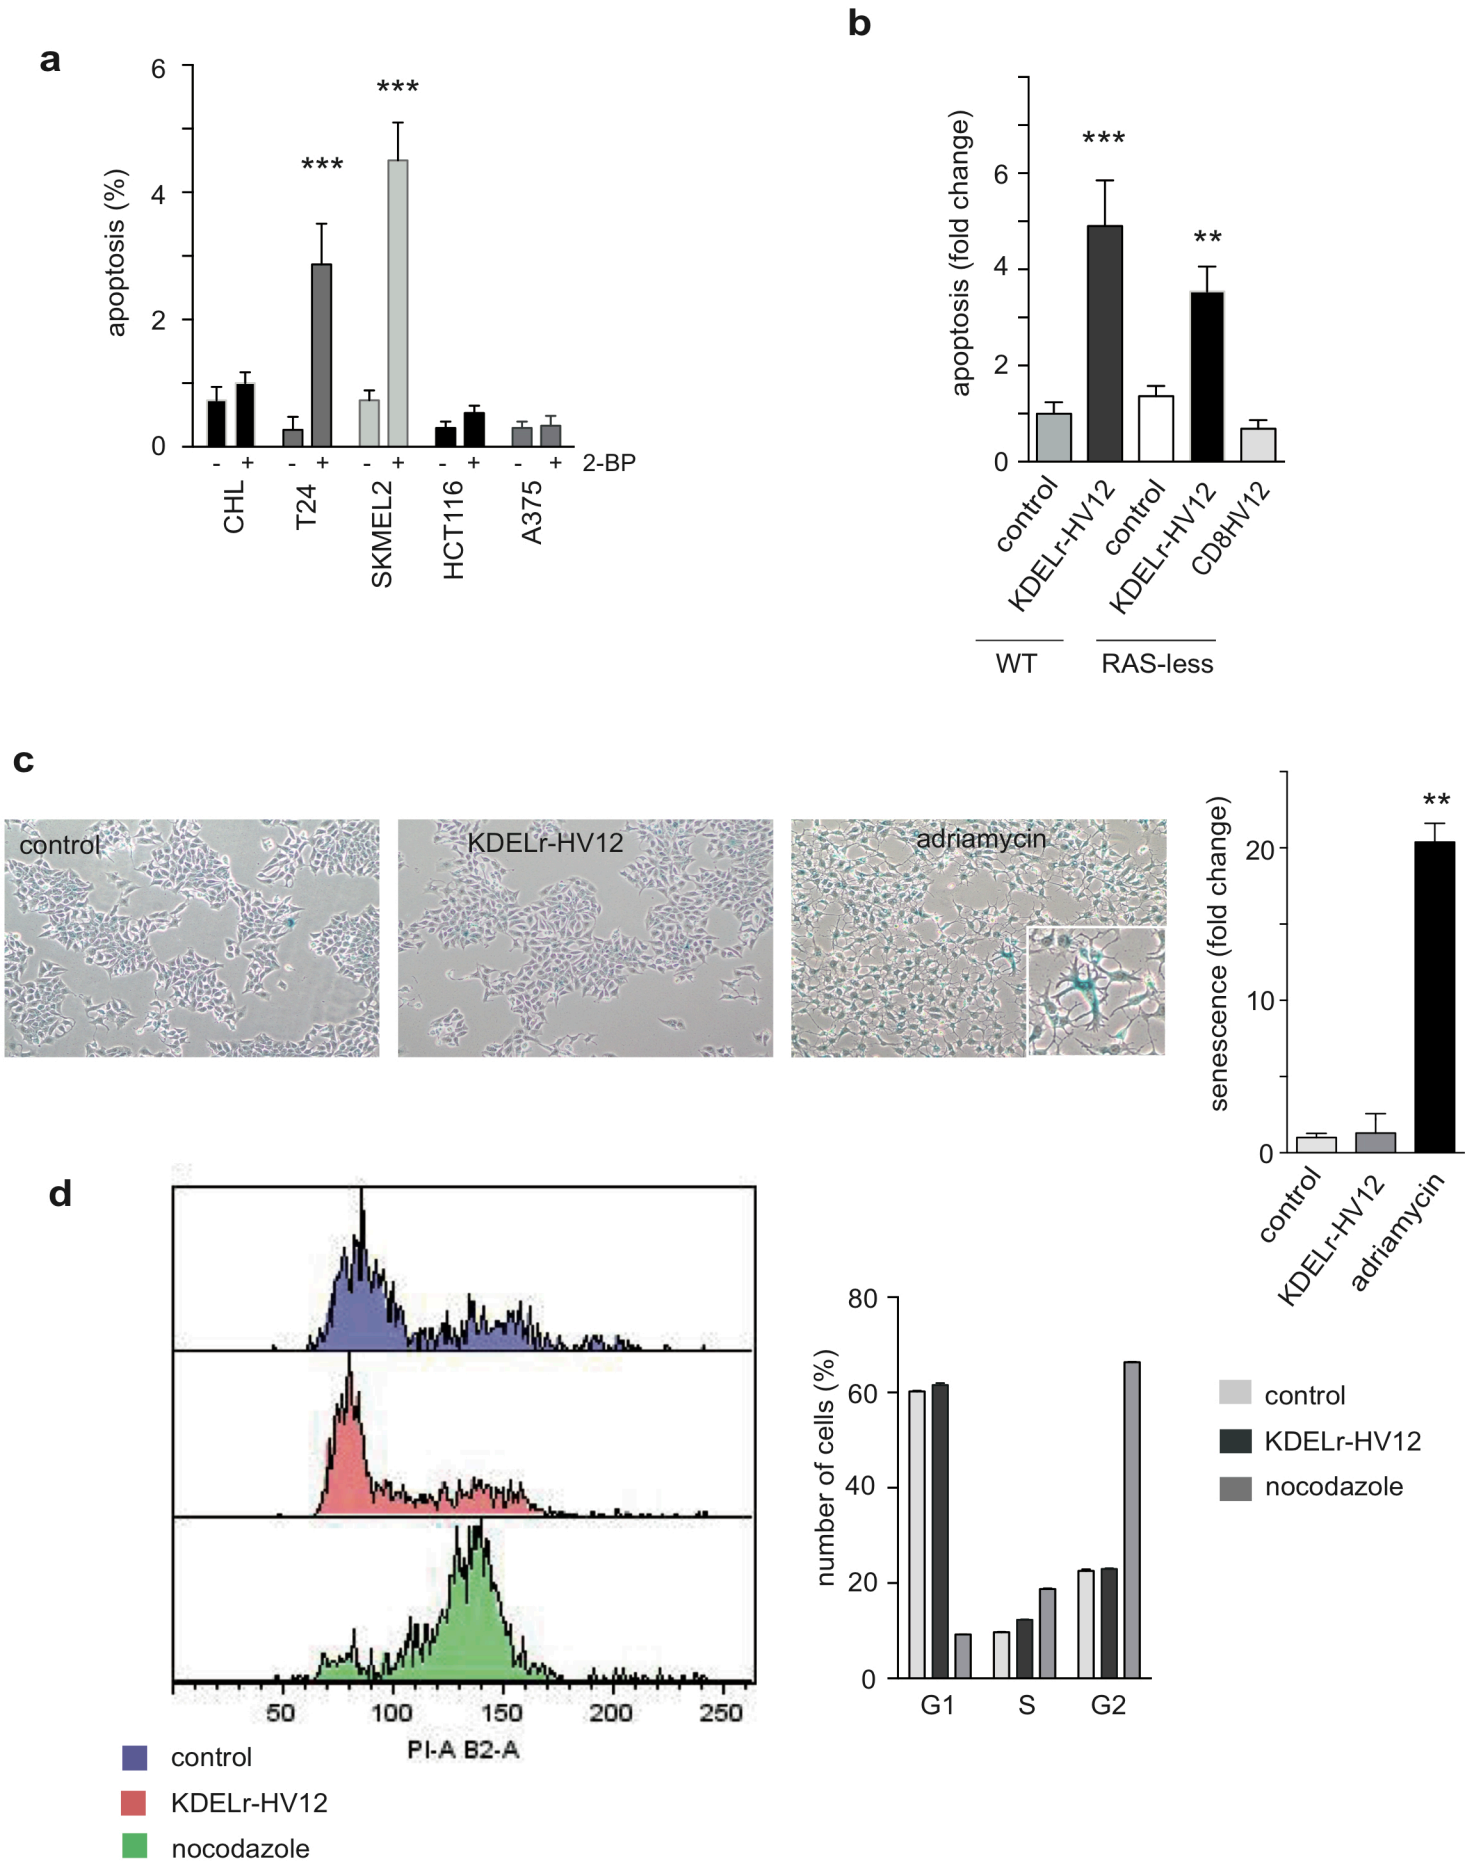

**Supplementary Figure 4. Induction of apoptosis by RAS activation at the GC. A)** Apoptotic response to 2-bromopalmitate (100 $\mu$ M, 24 hrs) of the indicated cell lines. **B)** Induction of apoptosis in wild type (WT) and Ras-less fibroblasts transfected with the indicated constructs (1  $\mu$ g each). Ras-less fibroblast were treated with tamoxifen 600nM for 5 days to ablate KRas previous transfection. **C)** GC-RAS (1  $\mu$ g) effects on senescence in MCF-7 cells. Adriamycin (1 $\mu$ M, 24 hrs) was used as a positive control. A-C data shows average  $\pm$  SEM from 3 independent experiments. \*\*  $p < 0.01$ ; \*\*\*  $p < 0.005$  by Student t-test. **D)** GC RAS (1  $\mu$ g) effects on cell cycle progression in MCF-7 cells. Data shows average  $\pm$  SEM from 3 independent experiments. \*\*  $p < 0.01$ ; \*\*\*  $p < 0.005$  by Student t-test.

# Supplementary Figure 5

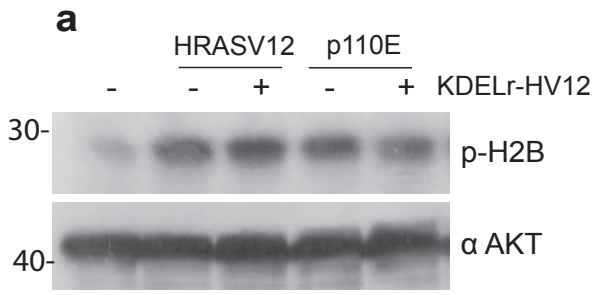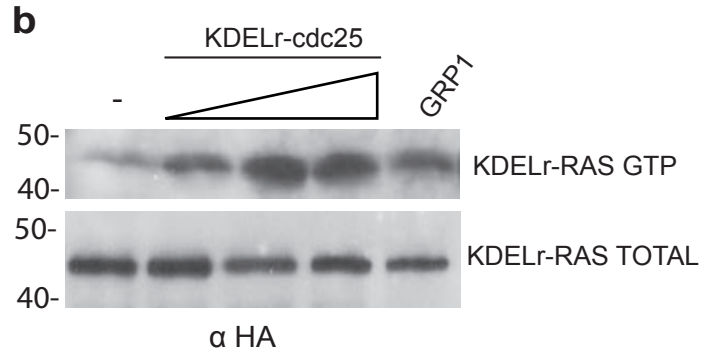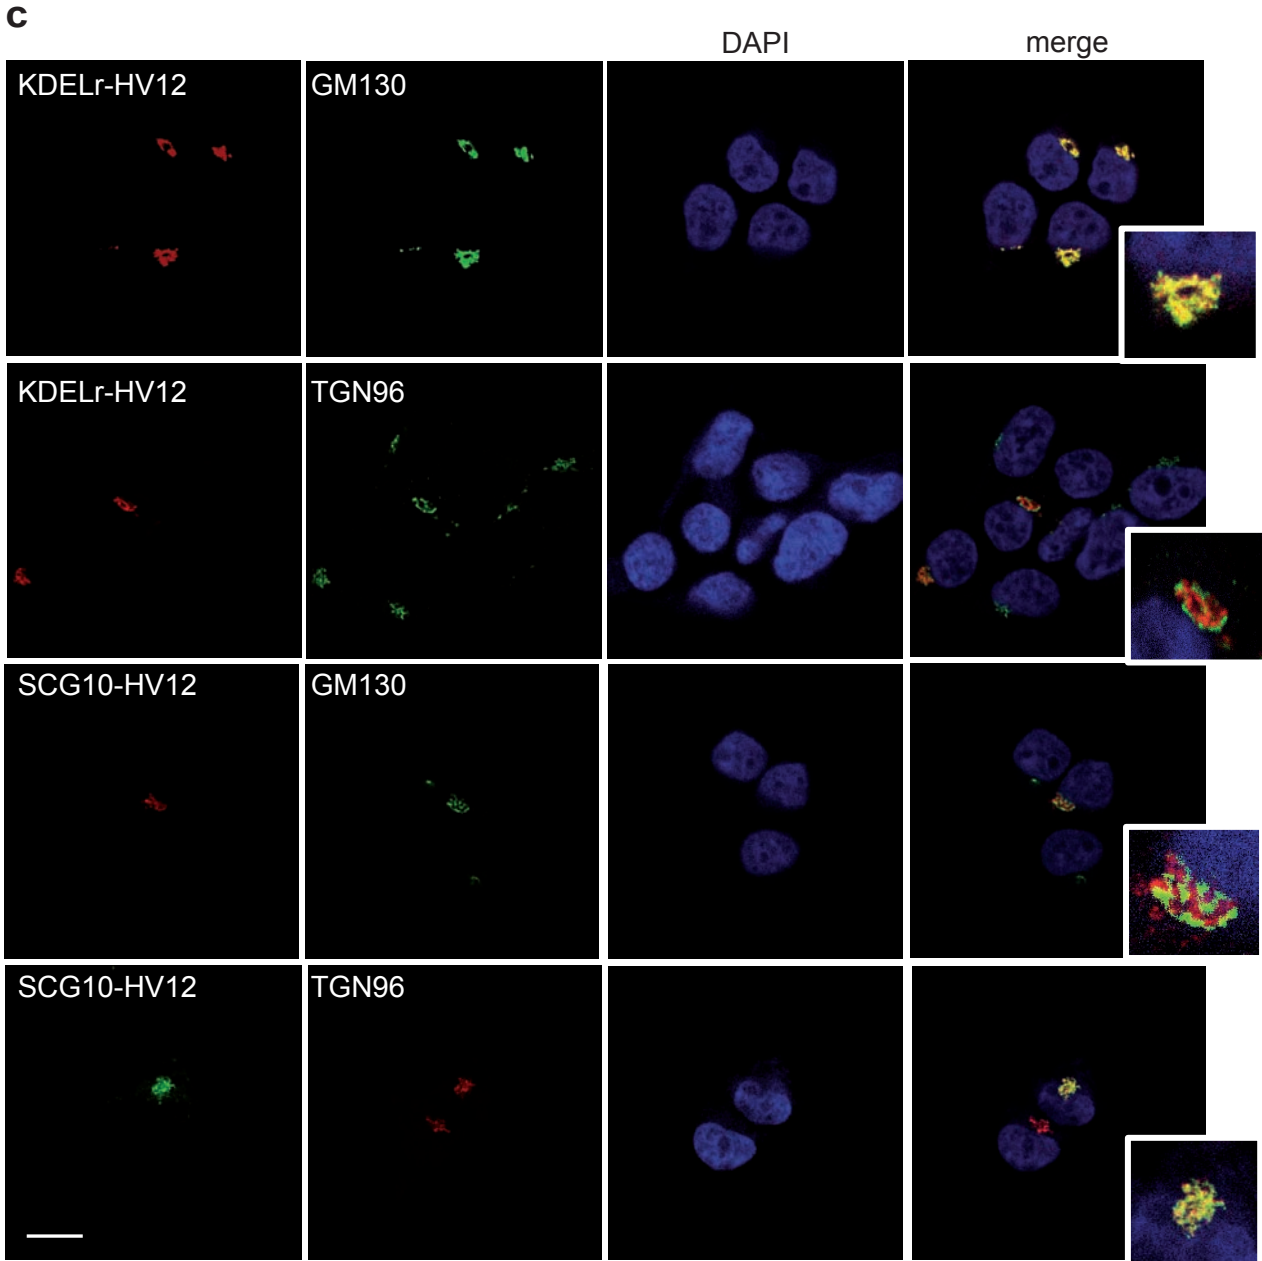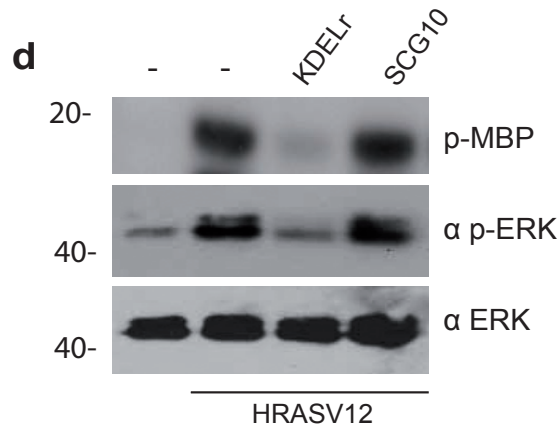

**Supplementary Figure 5. Effects of RAS activation at the GC on ERK phosphorylation. A)** AKT kinase activity levels in MCF-7 cells co-transfected with constitutively-activated HRAS or PI-3K (p110 subunit) (1  $\mu$ g) with (+) or without (-) KDELR-HV12 (1  $\mu$ g). AKT kinase activity was assayed using histone H2B as substrate. **B)** KDELR-CDC25 activates RAS at the GC. MCF-7 cells transfected with HA-tagged KDELR HRAS (0.5  $\mu$ g), unstimulated (-) or transfected with increasing concentrations (0.25-1  $\mu$ g) of KDELR-CDC25. Cells transfected with RASGRP1 (1  $\mu$ g) serve as positive control. GTP loading was assayed by GST-RBD (RAF) pull-down (KDEL-RAS GTP). **C)** Localization to the cis- and trans-golgi of KDELR- and SCG10-HV12 respectively. Confocal images of MCF-7 cells transfected with the indicated constructs co-stained with GM130 or TGN96 as cis- and trans-GC markers respectively. Scale bar = 10  $\mu$ m. **D)** Effect of trans-Golgi RAS signals on ERK phosphorylation and activity induced by HRASV12. in MCF-7 cells were transfected with the indicated constructs (1  $\mu$ g). ERK phosphorylation was assayed by immunoblotting. ERK kinase activity was assayed using MBP as substrate.



# Supplementary Figure 6

**a**

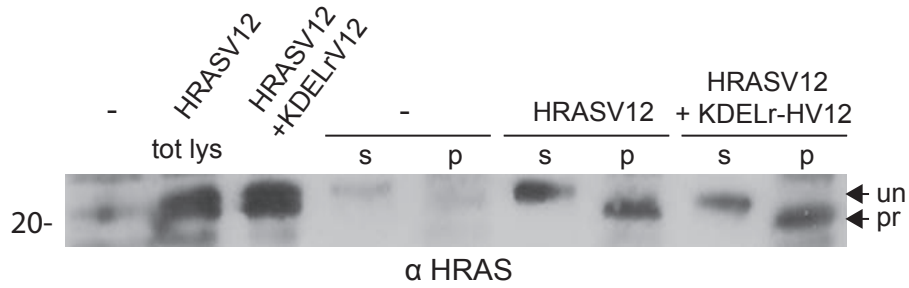

**b**

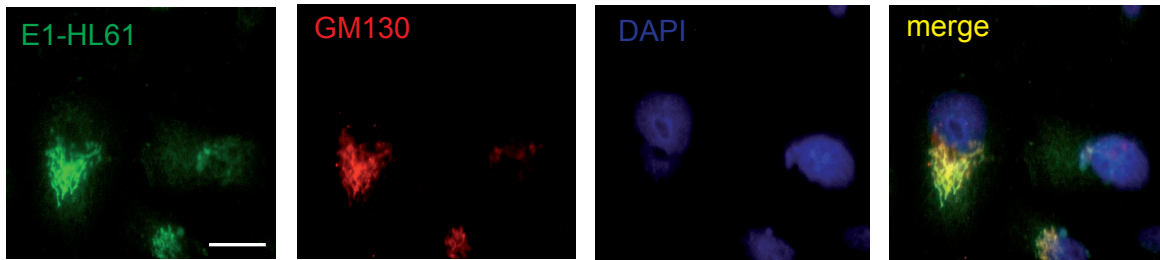

**c**

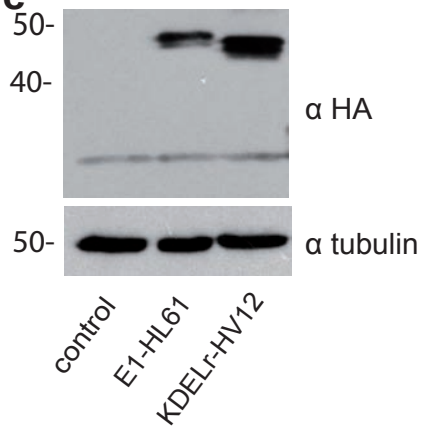

**d**

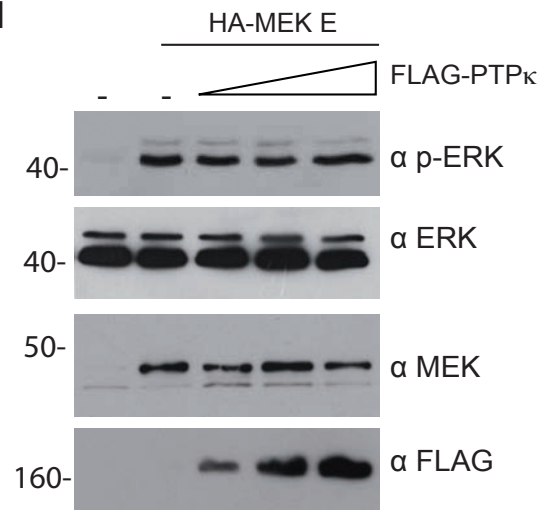

**e**

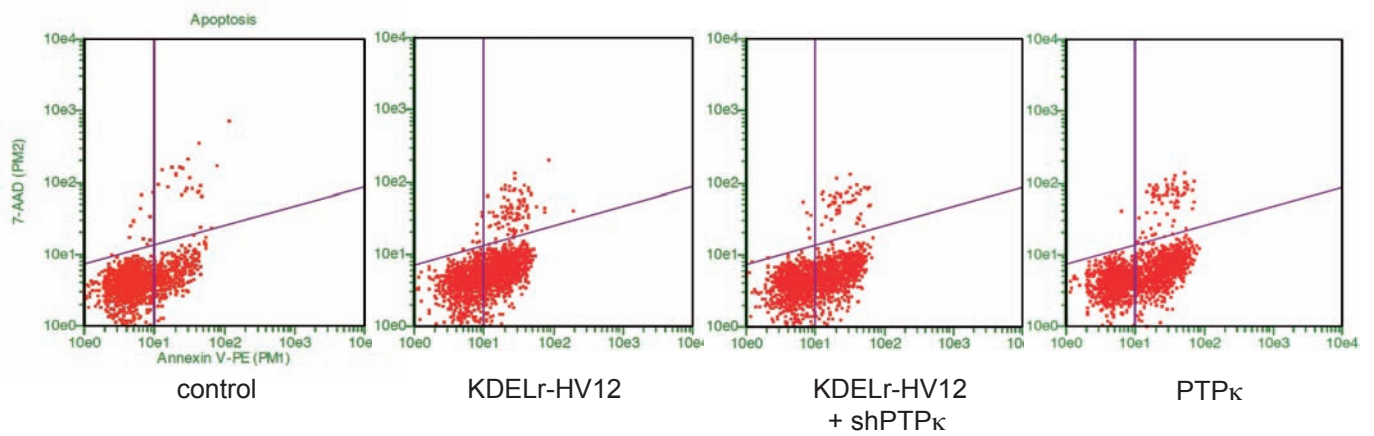



**Supplementary Figure 6. GC RAS effects on ERK activation via PTPRk. A)** Effect of GC RAS signals on RAS levels at the plasma-membrane. RAS levels at the soluble (S) and particulate (P) fractions of MCF-7 cells transfected with the indicated constructs. Arrows (un/pro) indicate processed and unprocessed RAS forms. **B)** E1-HL61 localization at the cis-Golgi in MCF-7 cells transfected with the construct (1  $\mu$ g). GC was revealed by GM 130 staining. Scale bar = 10  $\mu$ m. **C)** comparative expression levels of the Golgi-tethered constructs (1  $\mu$ g) in MCF-7 cells. **D)** Effects of PTPR $\kappa$  expression on ERK activation induced by MEK E. Cells were transfected with MEK E where shown, together with increasing concentrations (0.25-1  $\mu$ g) of a construct expressing PTPR $\kappa$ . **E)** Induction of apoptosis in MCF-7 cells transfected with the indicated constructs (1  $\mu$ g each), evaluated by annexin V detection using the Guava /nexin assay.

## Supplementary Figure 7

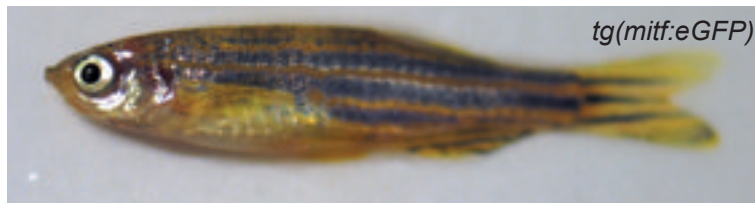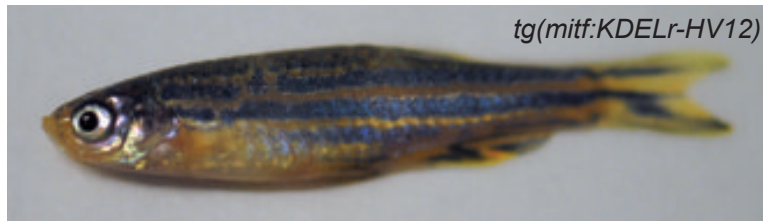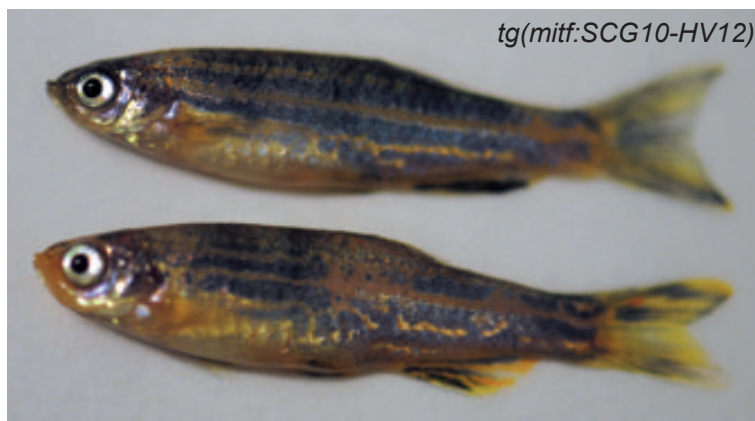

**Supplementary Figure 7.** Macroscopic view of representative fish expressing the indicated HRASV12 site-specific transgenes after 14 weeks.

# Supplementary Figure 8

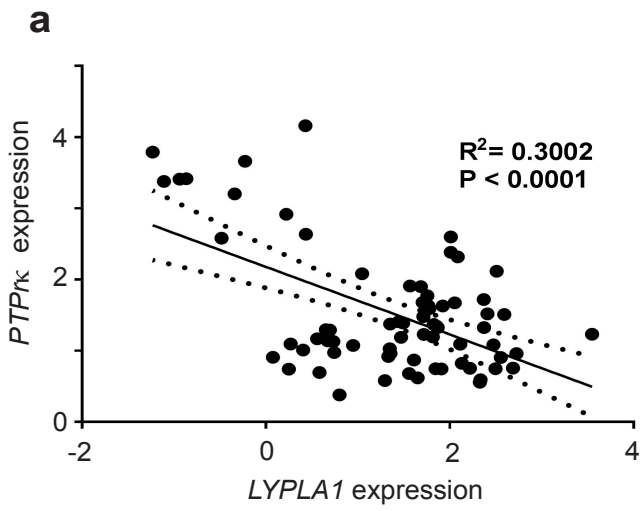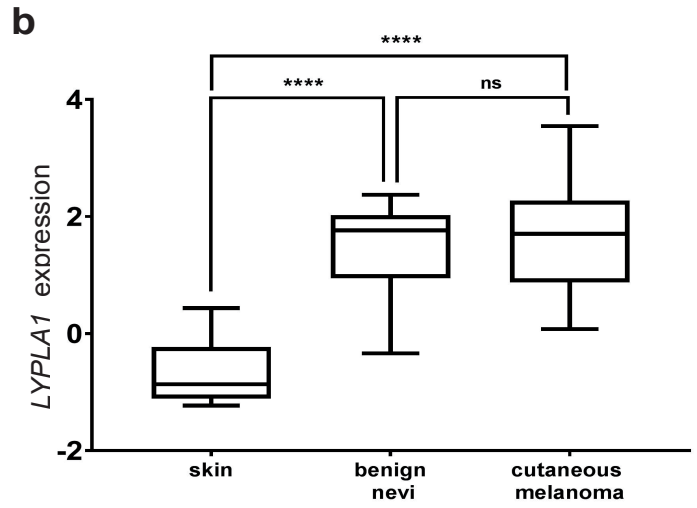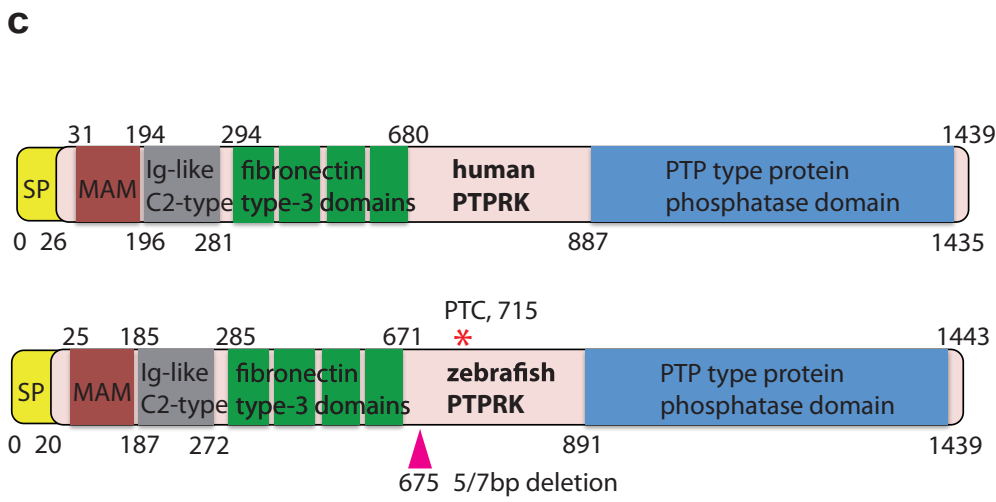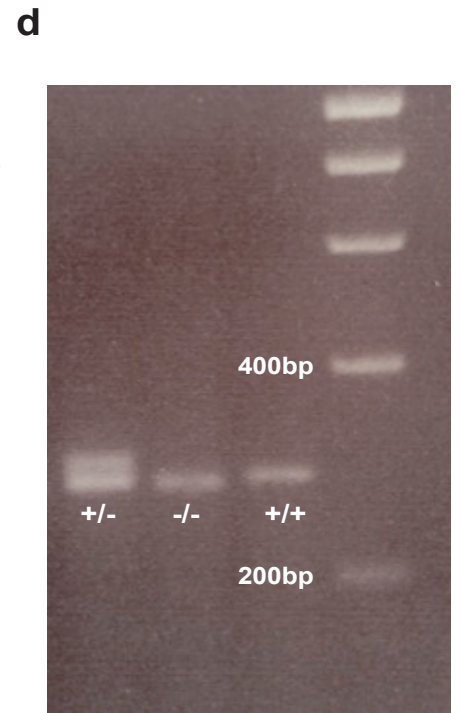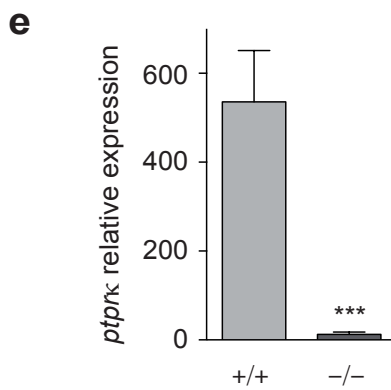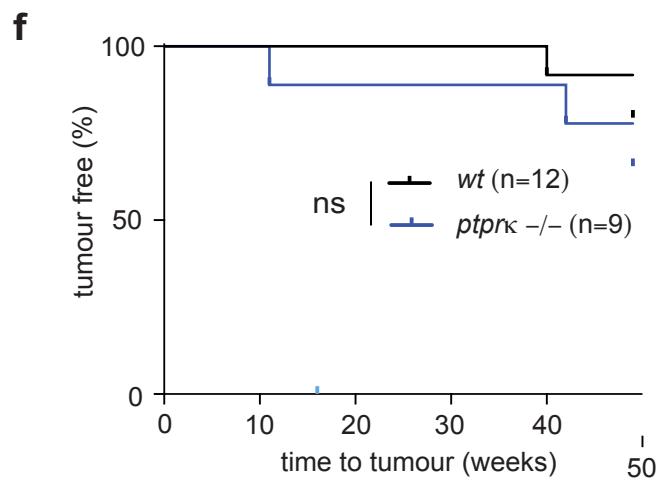

**Supplementary Figure 8. PTPRk is a tumor suppressor in melanoma.** **A)** Correlation of *PTPrk* and LYPLA1 (APT-1) expression levels in normal skin (n=7), benign nevi (n=18) and cutaneous melanoma samples (n=45) generated using an available gene dataset, accessed through the OncoPrint platform. **B)** Analysis of LYPLA1 (APT-1) expression in the samples from A. \*\*\* $p < 0.001$  \*\*\*\* $p < 0.0001$  by Student t-test. **C)** The CRISPR-Cas9 system was used to generate a 5 and 7 base pair deletion in the *ptprk* locus from amino acid 675, predicted to encode a premature truncating codon after 714 amino acids. **D)** The 5bp and 7bp deletions resolved on a 3% agarose gel. **E)** qRT-PCR demonstrates *ptprk* mRNA is significantly down-regulated in *ptprk* mutant embryos 6 hours post fertilisation. **F)** Kaplan-Meier plot of protruding tumour incidence in *ptprk* wild-type nacre animals (n=12) compared to *ptprk* -/- (n=9) expressing BRAFV600E specifically in melanocytes. ns - not significant by Mantel-Cox test.

## Supplemental Figure 9

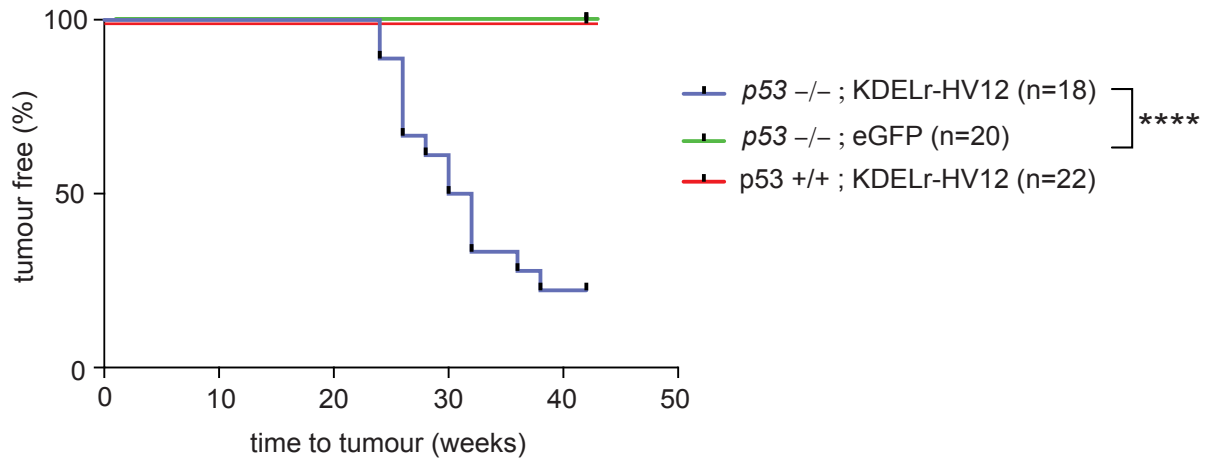

**Supplementary Figure 9. tp53 status determines GC-RAS induced melanomagenesis.**

Kaplan-Meier plot of protruding tumor incidence in *p53* mutant nacre animals (n=20, green line) injected with EGFP or *p53* wild-type nacre animals injected with KDEL-H12V (n=22, red line), compared to *p53* mutant nacre animals (n=18, blue line) injected with KDEL-H12V. \*\*\*\* $p < 0.0001$  by Mantel-Cox test.

# Supplementary Figure 10

## Figure 1

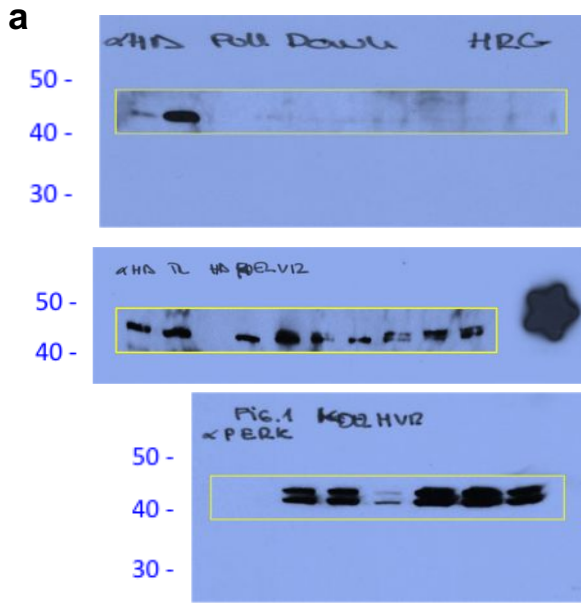

## Figure 2

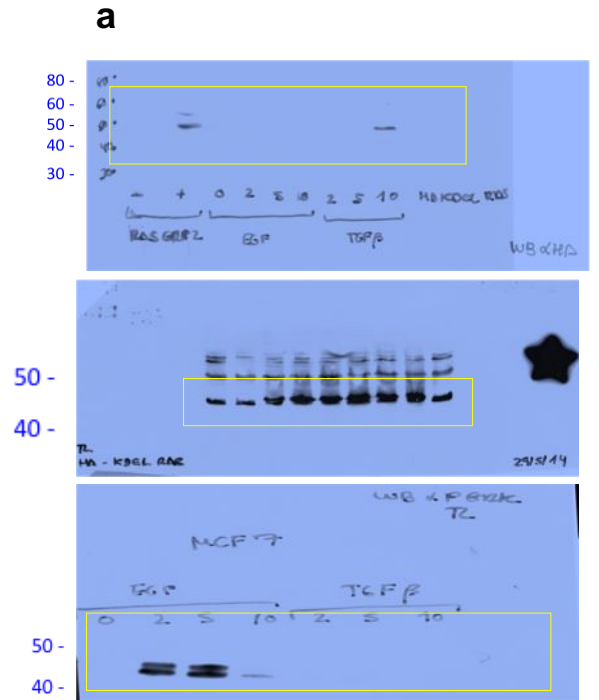

## Figure 3

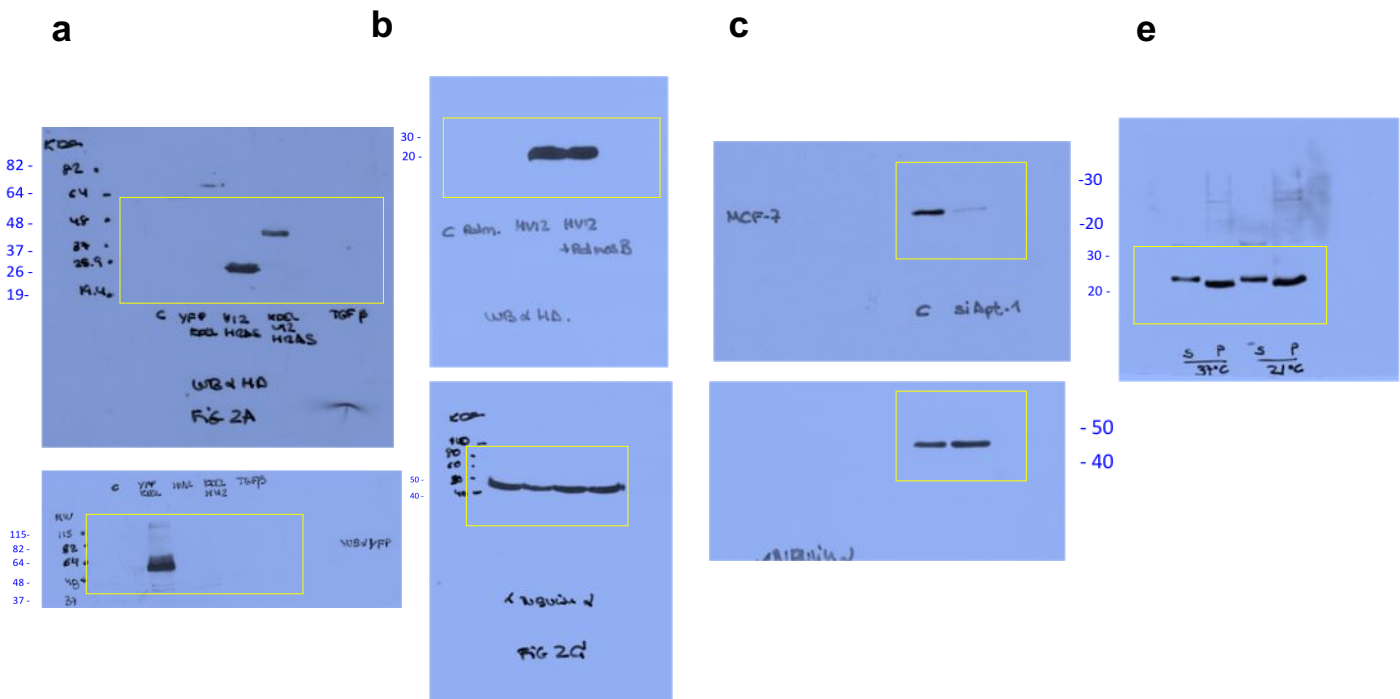



# Figure 4

**a**

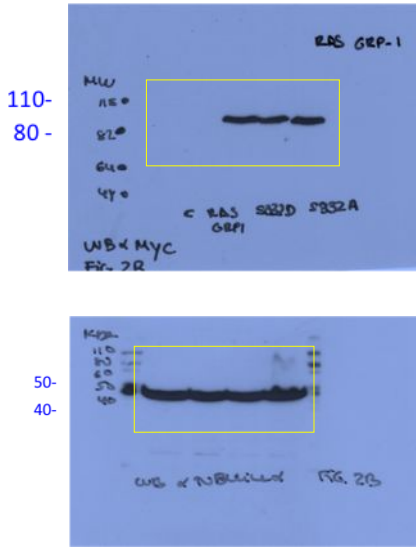

**b**

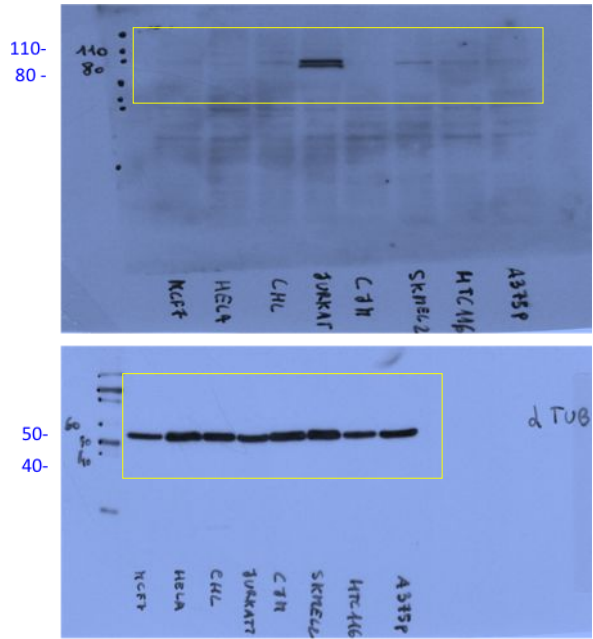

**c**

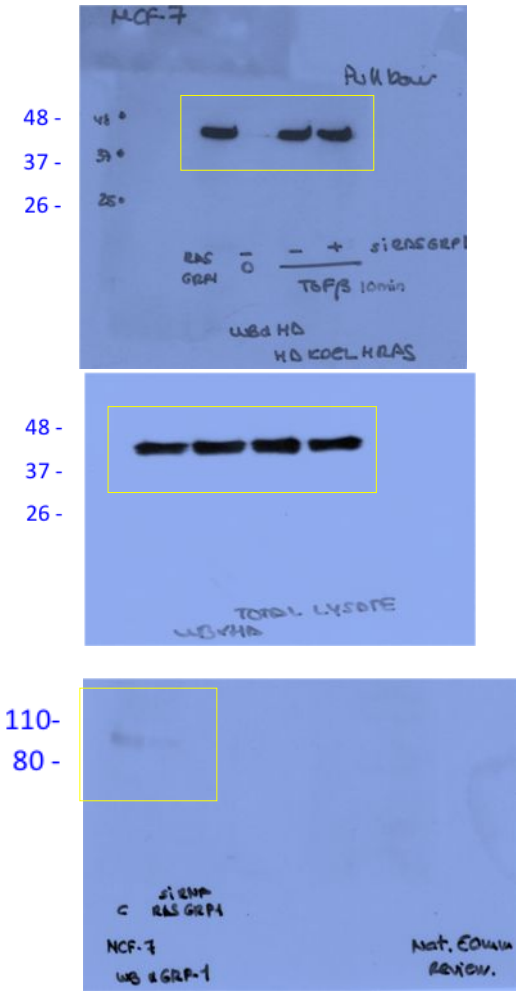

**Figure 5**

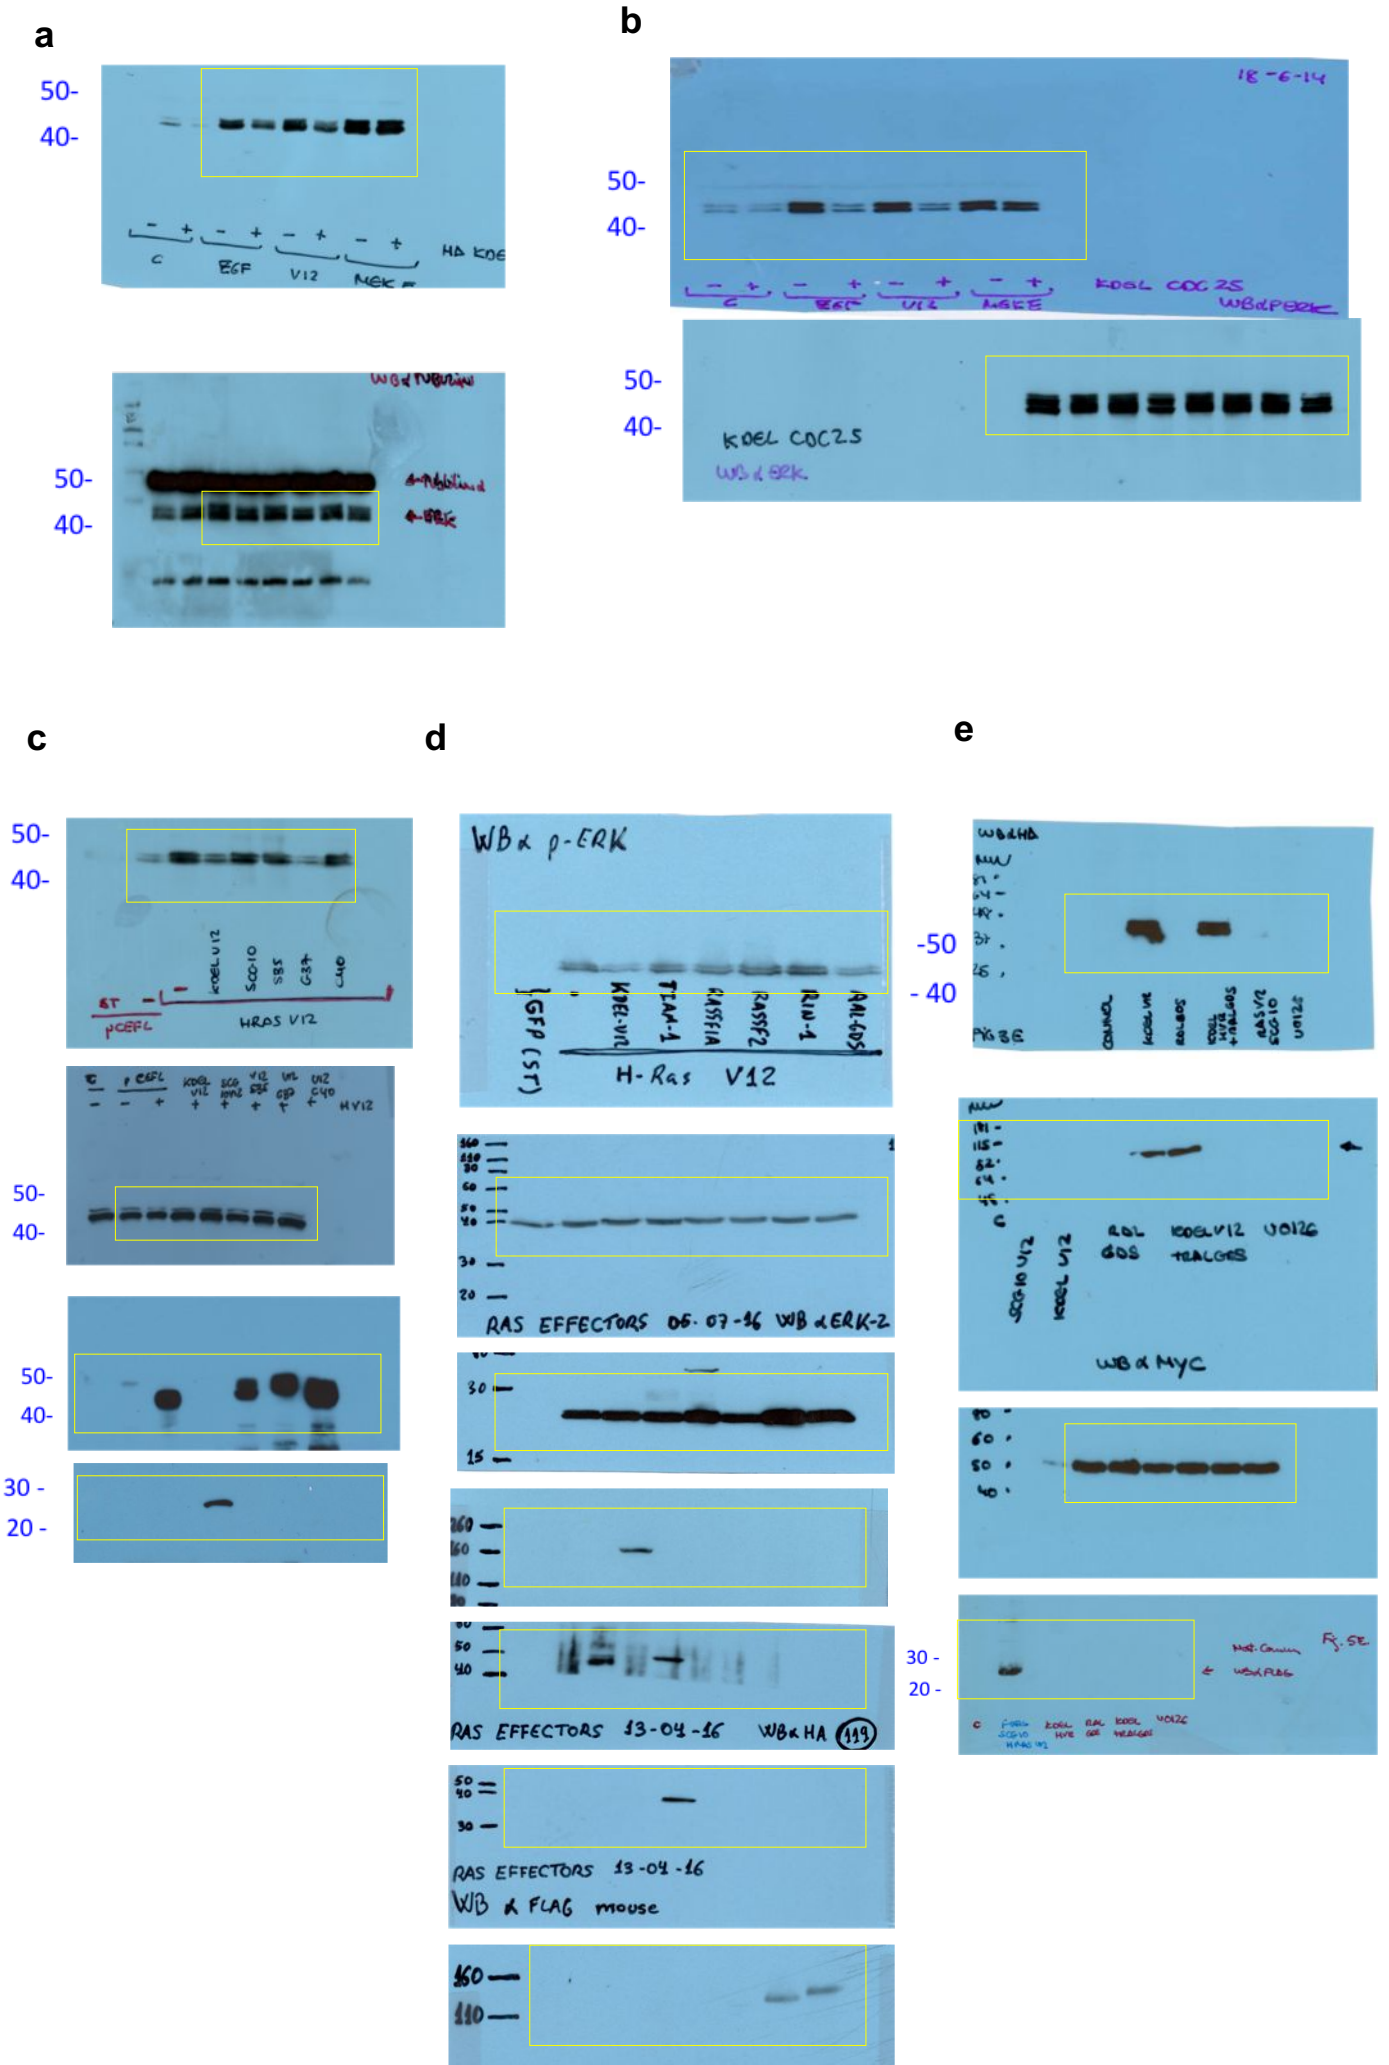

# Figure 6

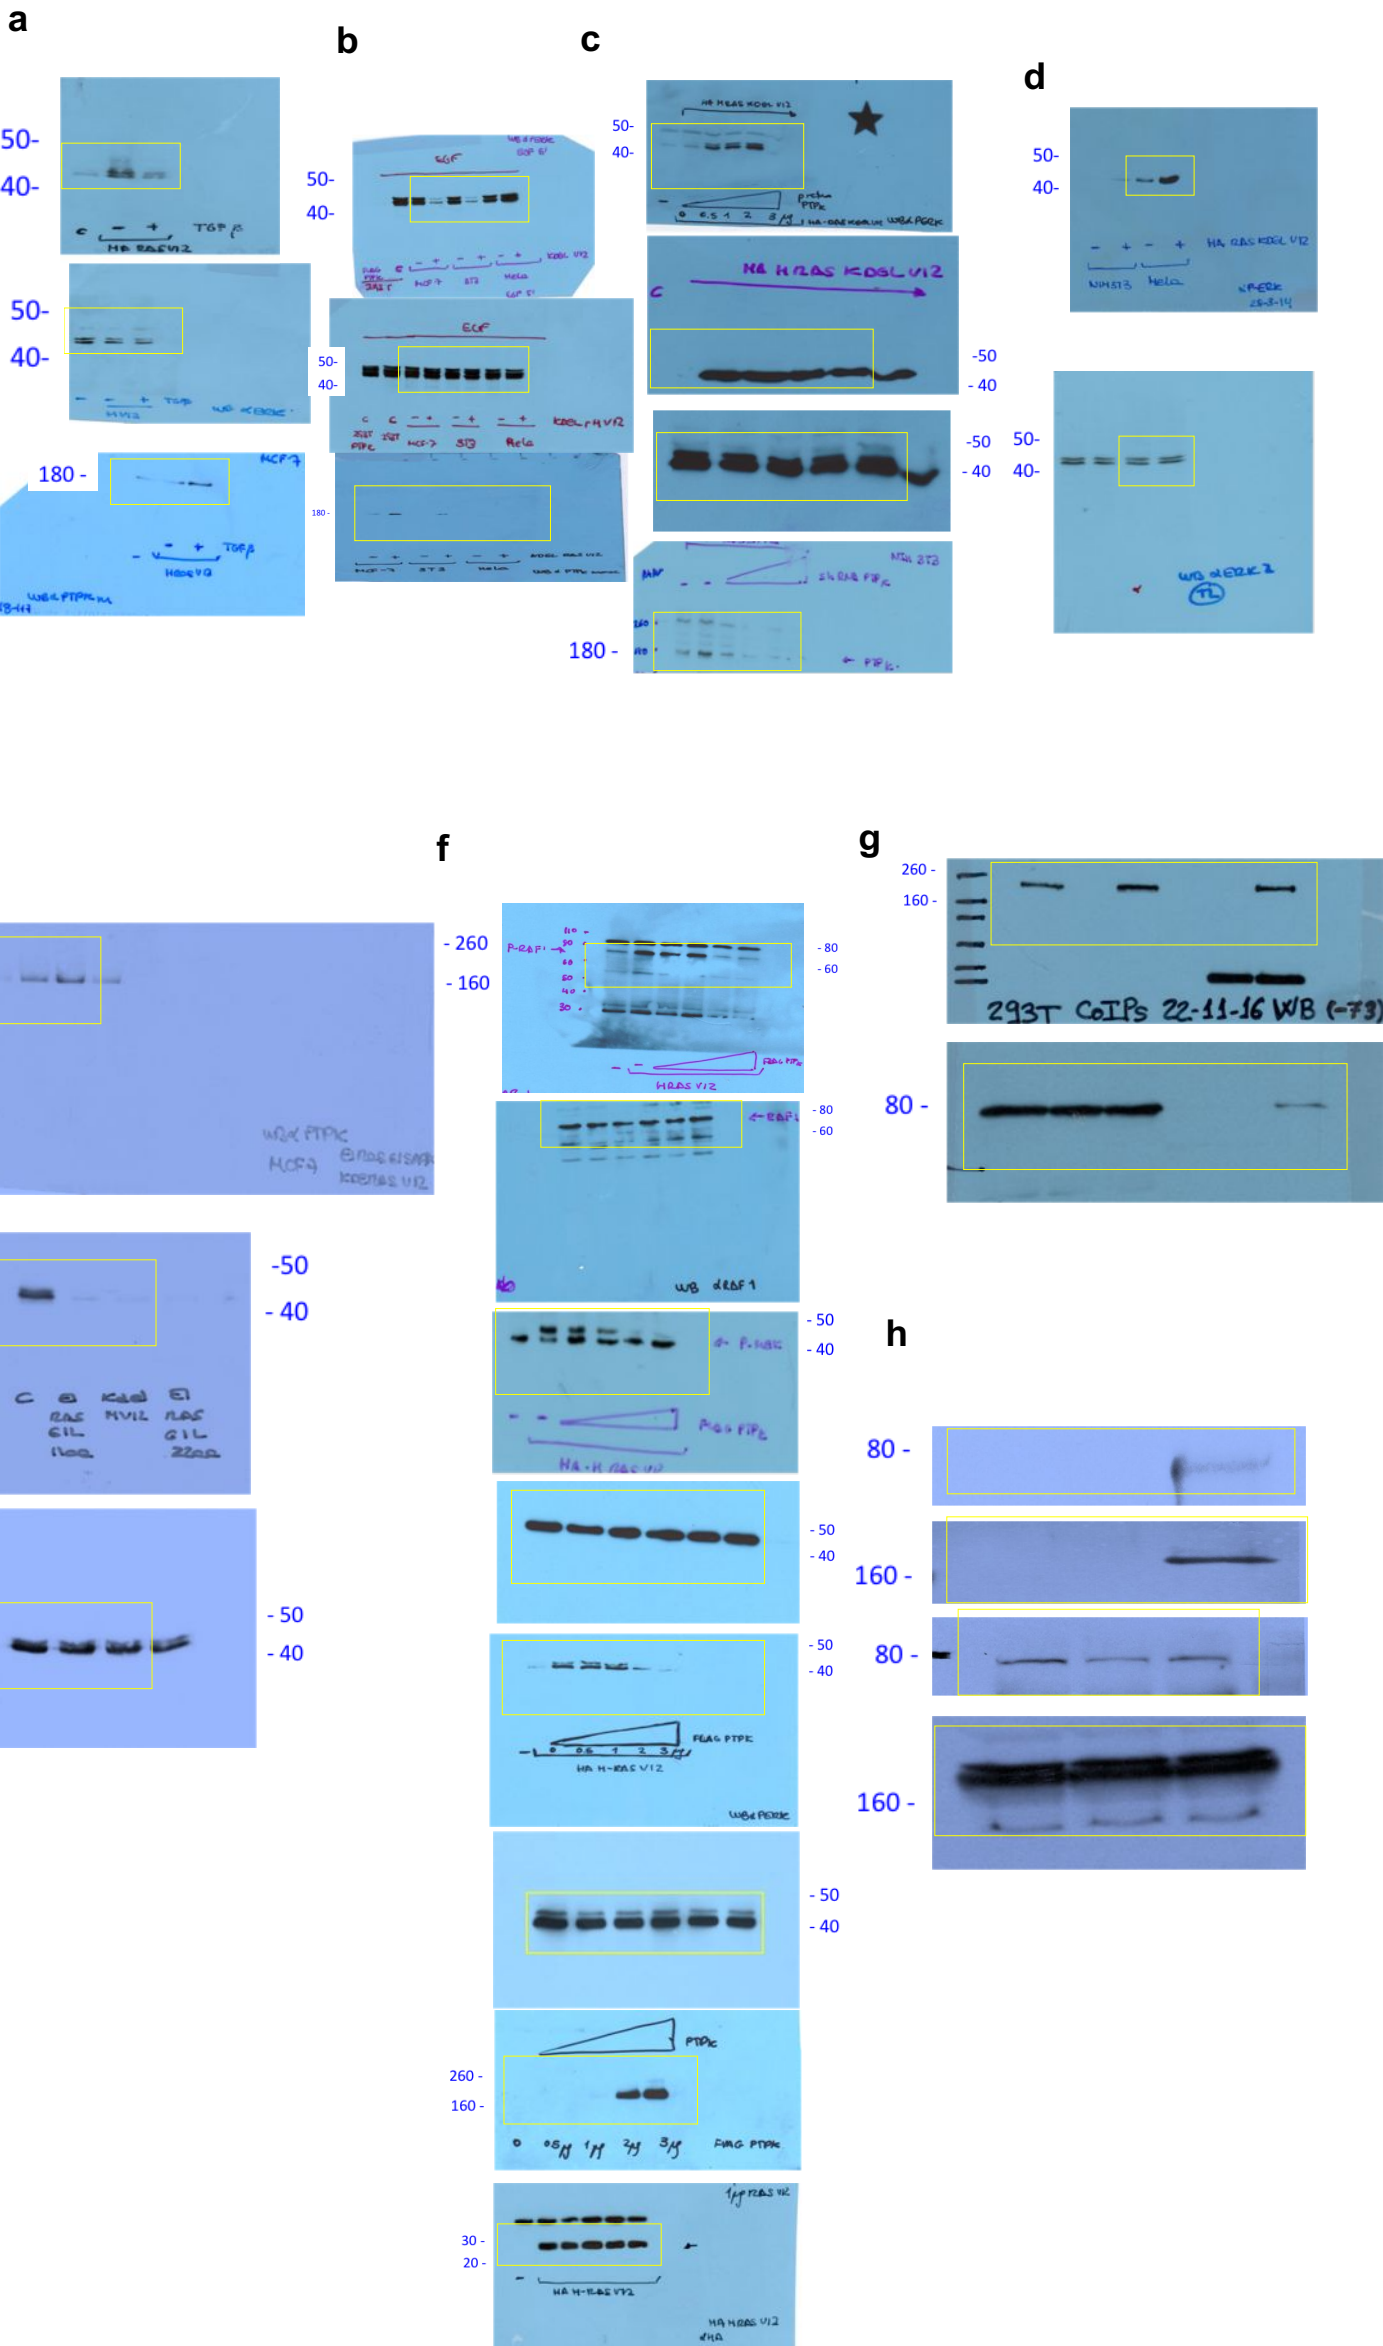

# Figure 7

a

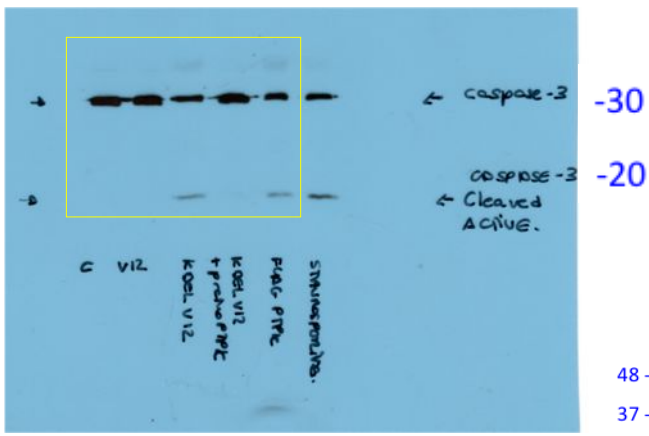

b

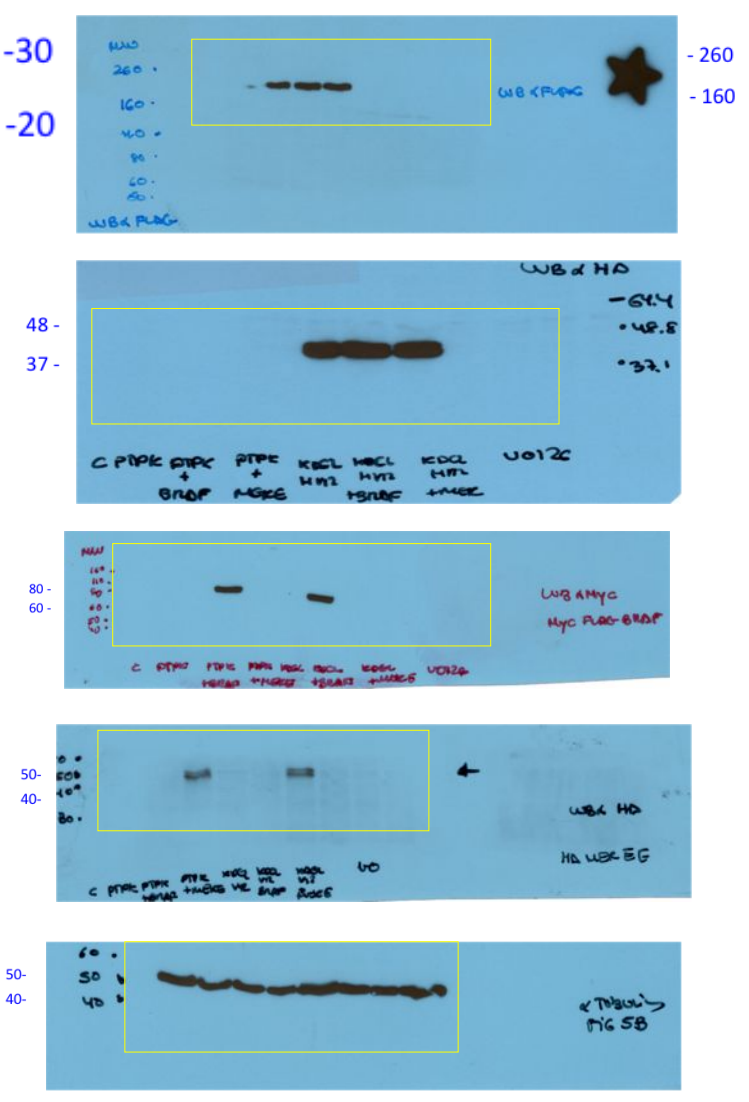

**Figure 8**

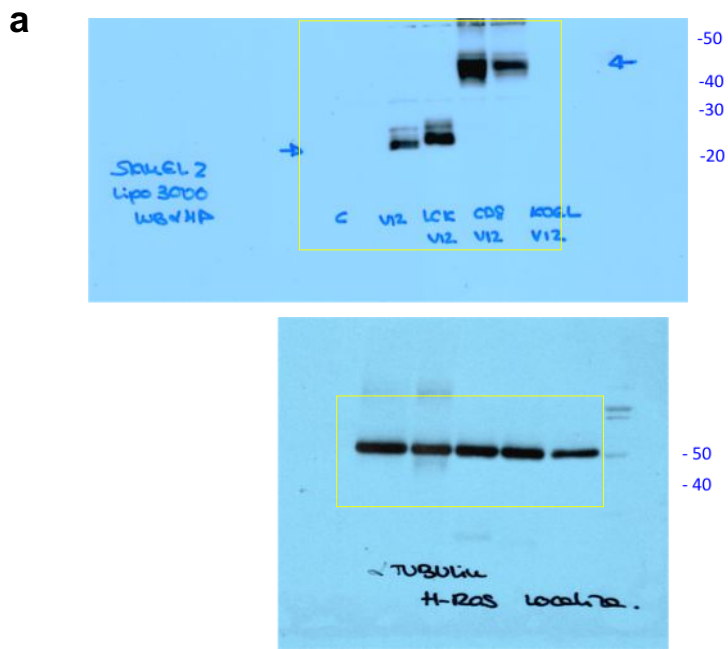

**Figure 10**

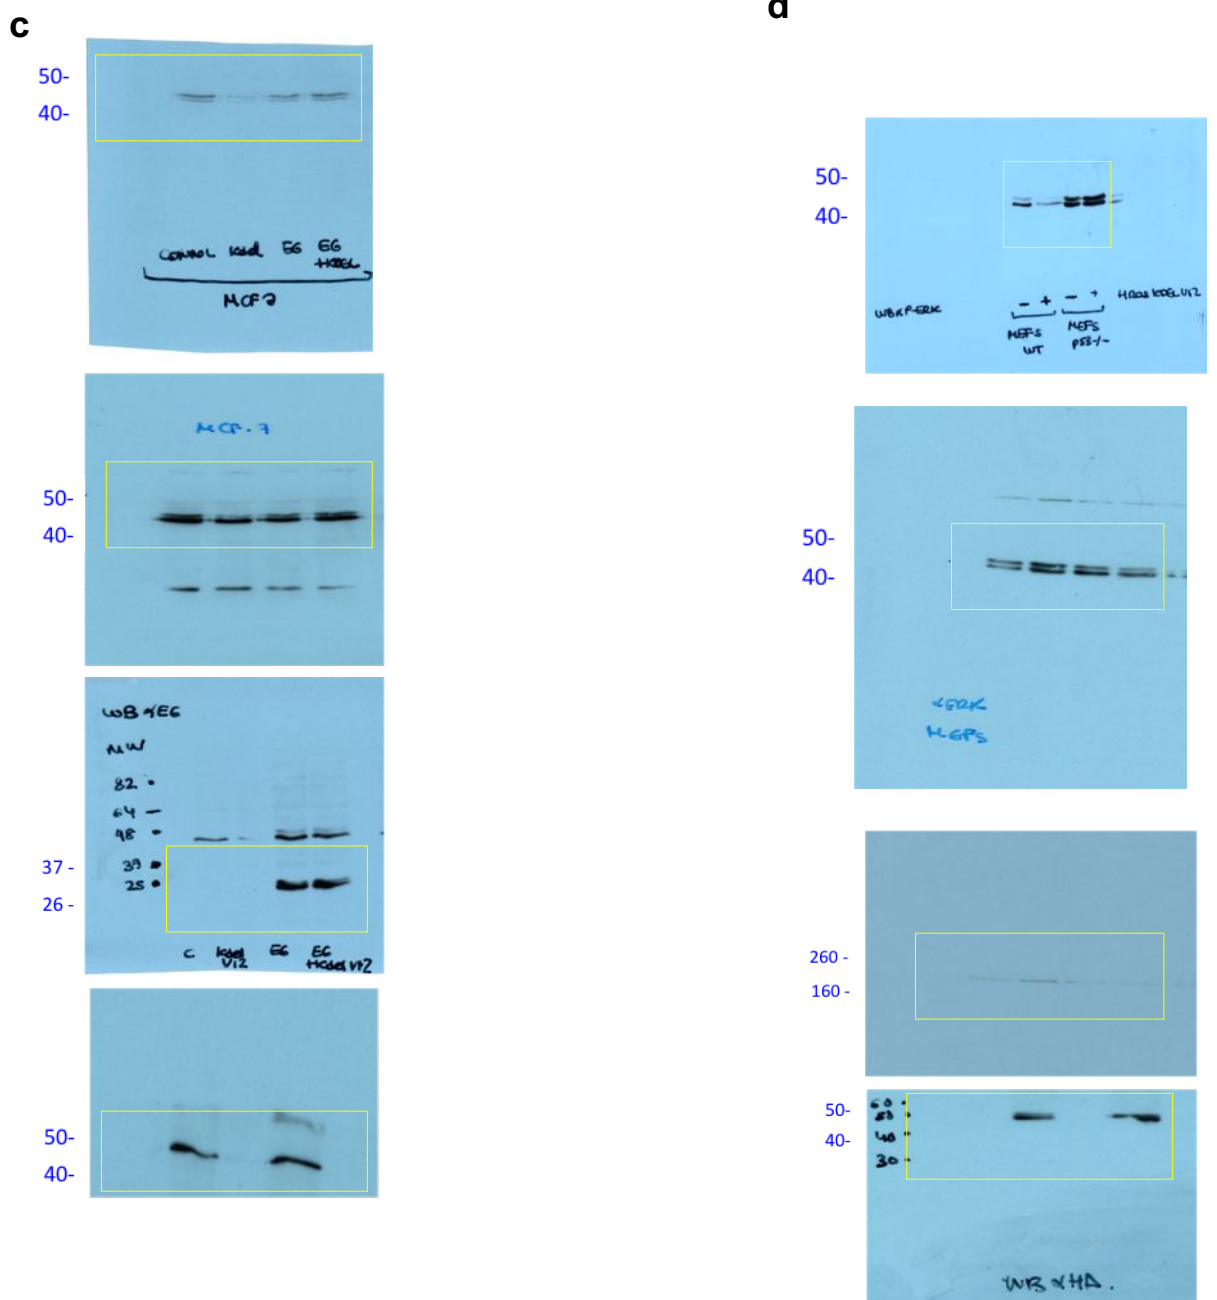

**Supplementary Figure 10 .Uncropped original blots used in Figure 1, 2, 3, 4, 5,6,7,8,10**

|           | vector | KDELrHV12   | KDELr GFP  | foci / $\mu$ DNA |
|-----------|--------|-------------|------------|------------------|
| H-Ras V12 | 4860   | 1960 (-40%) | 4600 (-6%) |                  |
| M1 V12    | 9515   | 2920 (-70%) |            |                  |
| LCK V12   | 5580   | 3160 (-44%) |            |                  |
| CD8 V12   | 6711   | 2980 (-56%) |            |                  |
| K-Ras V12 | 5411   | 3860 (-30%) |            |                  |
| N-Ras V12 | 4850   | 2560 (-48%) |            |                  |
| v-Src     | 6005   | 1730 (-72%) |            |                  |
| v-Sis     | 1280   | 650 (-49%)  |            |                  |
| Erb-2     | 2400   | 760 (-69%)  |            |                  |

**Supplementary Table 1. Active Ras at the Golgi Complex prevents cellular transformation.** 30% confluent NIH3T3 were plated and transfected using Lipofectamine with low amounts (0.5  $\mu$ g) of the indicated plasmids and grown for 3 weeks in DMEM supplemented with 10% calf serum. The media was changed every 3 days and transformation of cells and the formation of foci was monitored using microscopy and visual inspection. Results show mean of three independent experiments.

| Purpose                   | Oligonucleotide sequence                                                                                                                |
|---------------------------|-----------------------------------------------------------------------------------------------------------------------------------------|
| create pME-HRAS-V12       | SGGGGACAAGTTTGTACAAAAAAGCAGGCTCCGAATTCTA<br>TTTGCAGCTCATGCAGCCAGG<br>ASGGGGACCACTTTGTACAAGAAAGCTGGGTGTTACATGA<br>GCCAGGATCCCTCTCATCGG   |
| create pME-KDELr-HRAS-V12 | SGGGGACAAGTTTGTACAAAAAAGCAGGCTCCAAGCTTAT<br>GAATCTCTTCCGATTC<br>ASGGGGACCACTTTGTACAAGAAAGCTGGGTCCGGATCCT<br>GCCGGCAAACCTCAA             |
| create pME-Lck-HRAS-V12   | SGGGGACAAGTTTGTACAAAAAAGCAGGCTAGCTTATGGG<br>CTGTGGCTGCAGCTCA<br>ASGGGGACCACTTTGTACAAGAAAGCTGGGTGATCCGTTTT<br>CCATCCAGTCATCTTCC          |
| create pME-CD8-HRAS-V12   | SGGGGACAAGTTTGTACAAAAAAGCAGGCTCAAGCTTATG<br>AGACCCAGACTGTGGCTGCTG<br>ASGGGGACCACTTTGTACAAGAAAGCTGGGTTCACCTTGTA<br>GAATCGCTTCATGAATCTCAG |
| create pME-NRAS-D12       | SGGGGACAAGTTTGTACAAAAAAGCAGGCTGGATGTACGA<br>CGTTCCTGATTAC<br>ASGGGGACCACTTTGTACAAGAAAGCTGGGTGTTACATCA<br>CCACACATGGCAATCC               |
| create pME-BRAF-E600      | SGGGGACAAGTTTGTACAAAAAAGCAGGCTAGGGCGAATT<br>CCAGCAC<br>ASGGGGACCACTTTGTACAAGAAAGCTGGGTTCAGTGGAC<br>AGGAAAC                              |

|                                                                 |                                                                                                                                                                                   |
|-----------------------------------------------------------------|-----------------------------------------------------------------------------------------------------------------------------------------------------------------------------------|
| qRT-PCR to zebrafish <i>ptprk</i>                               | <b>S</b> ACCAGAACCAAGTGTGCAGAG<br><b>AS</b> ATGGTGACGTTGAAGGTGTG                                                                                                                  |
| zebrafish <i>ptprk</i> sequencing                               | <b>S</b> CCGTCAACAACAAACTCTG<br><b>S</b> CTGAAGATGATCCTCACCAAC<br><b>S</b> GACTACAACATCTACTTCCAG<br><b>S</b> AACTCAAGGTCCTGTCCAC<br><b>S</b> CCGAAATCACGACAAGAAC                  |
| <i>ptprk</i> zebrafish mutant genotyping                        | <b>S</b> CAGATTGTGGTGAAGGAGATC<br><b>AS</b> CCACTGACCTTCTCCACTC                                                                                                                   |
| zebrafish <i>ptprk</i> cloning                                  | <b>S</b> GACAGACA <u>ATTGGCCACC</u> ATGGATATCATCATTTTGAGC<br><b>AS</b> GACAGA <u>ACTAGTTT</u> ATGAGGTCTCGATGAACTCCAG                                                              |
| Amplify DNA template to synthesise zebrafish <i>ptprk</i> guide | <b>S</b> <u>TAATACGACTCACTATAGGAGCCGCTGCCGTTT</u> ACTG<br>GTTTTAGAGC<br><b>AS</b> AAAAGCACCGACTCGGTGCCACTTTTTCAAG<br><u>T7 promoter.</u> <i>target sequence scaffold sequence</i> |

**Supplementary Table 2 . Primer oligonucleotide sequences** S – sense; AS – antisense; enzyme sites where applicable underlined.
